# Supplementary material for: Characteristics of amnestic patients with hypometabolism patterns suggestive of Lewy body pathology
Source: PubMed Central journal article supplement — Brain. 2023 Jun 7;146(11):4520–31. doi: 10.1093/brain/awad194 (PMC10629761; doi:10.1093/brain/awad194), 2023-06-07
Supplement: awad194_supplementary_data.pdf [file awad194_supplementary_data.pdf]

## Supplementary Figures

**Supplementary Figure S1:** Outline of the classification process of the in-vivo cohort.

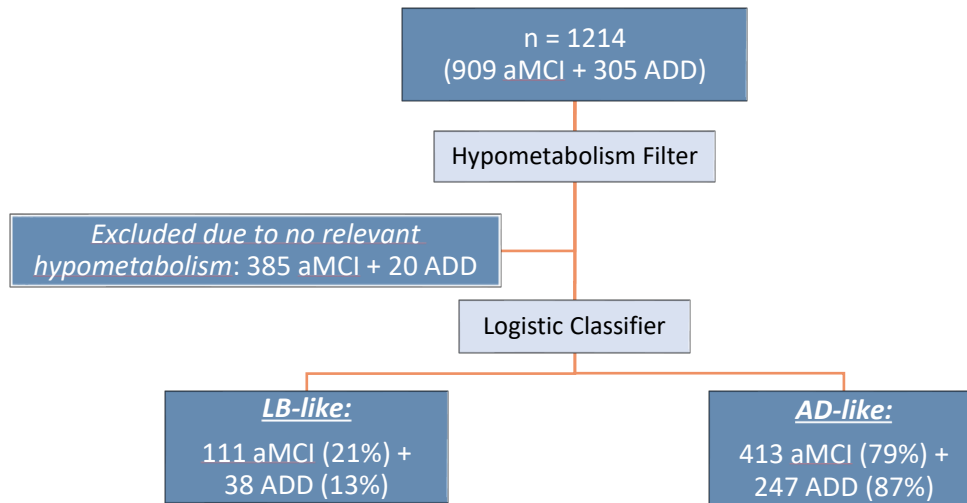

**Supplementary Figure S2:** CISr, MTL SUVR and Occipital SUVR measurements from the different groups. The obtained measurements are compared with measurements from 179 cognitively normal (CN) subjects from the ADNI cohort.

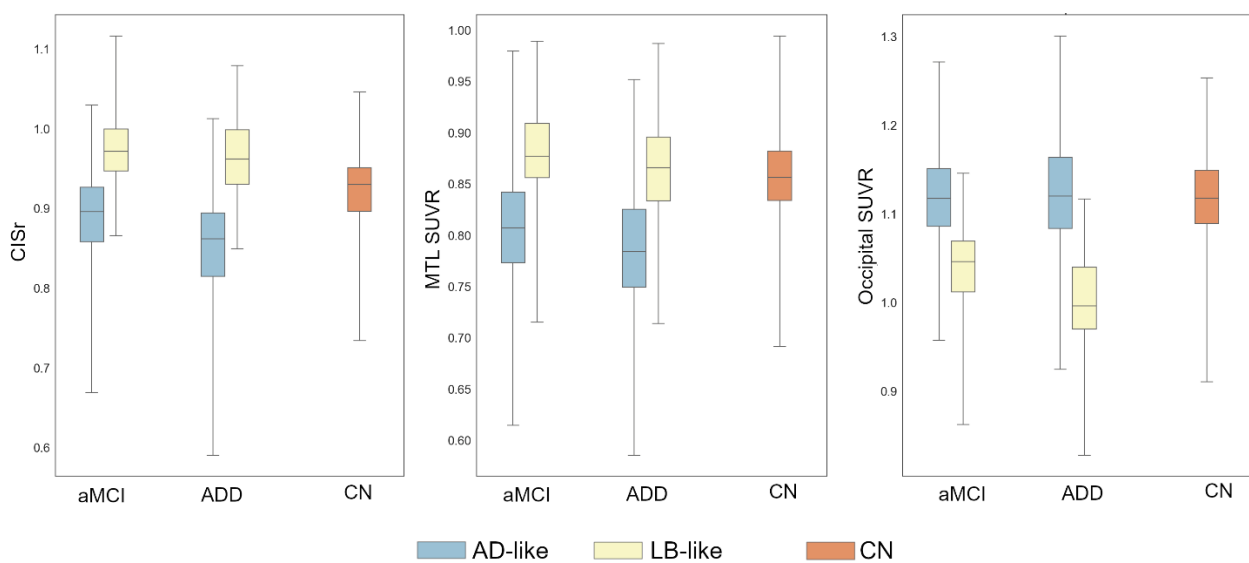

**Supplementary Figure S3:** Global SUVR values of A $\beta$  PET images.

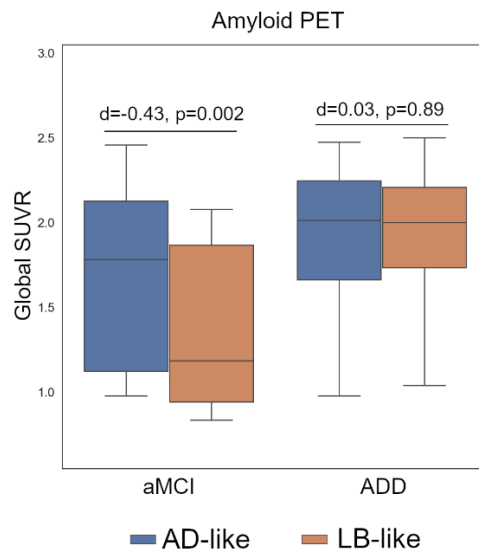

**Supplementary Figure S4:** SUVR values for the different Braak VOIs in tau PET.

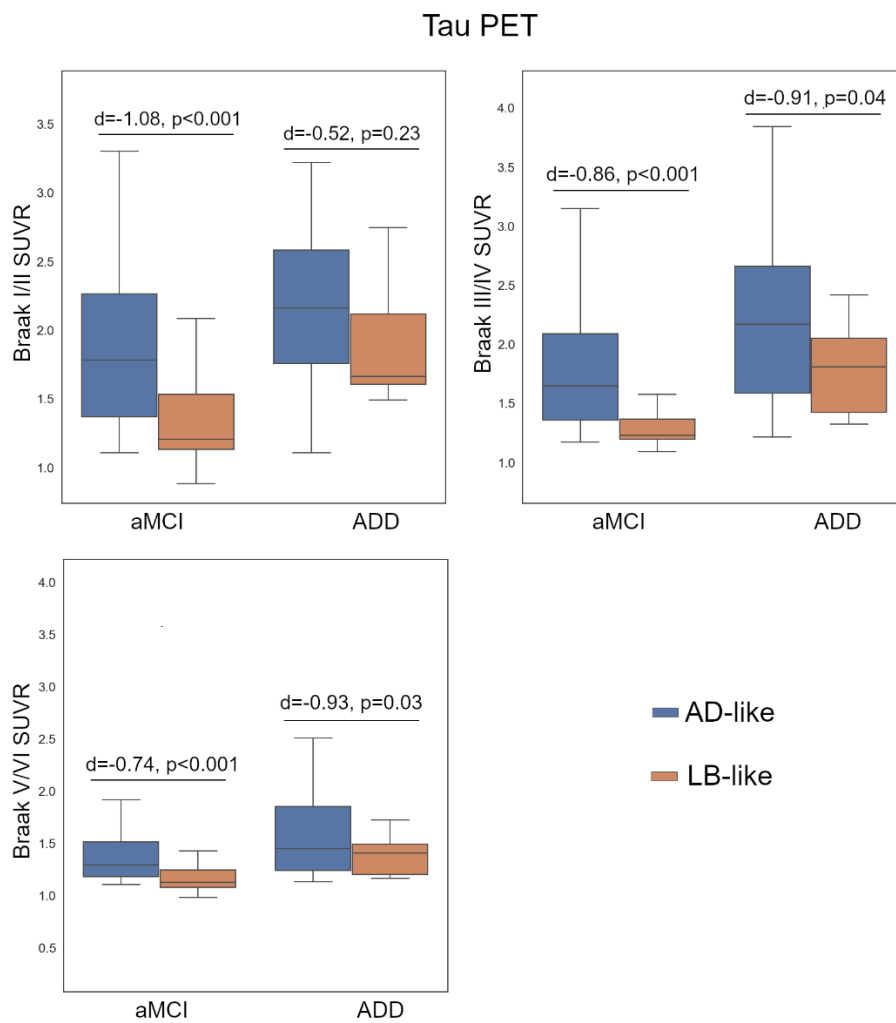

**Supplementary Figure S5:** Proportion of AD-like (blue line) and LB-like (red line) patients remaining in the aMCI diagnosis group without progressing to dementia according to the fitted Cox proportional hazard models.

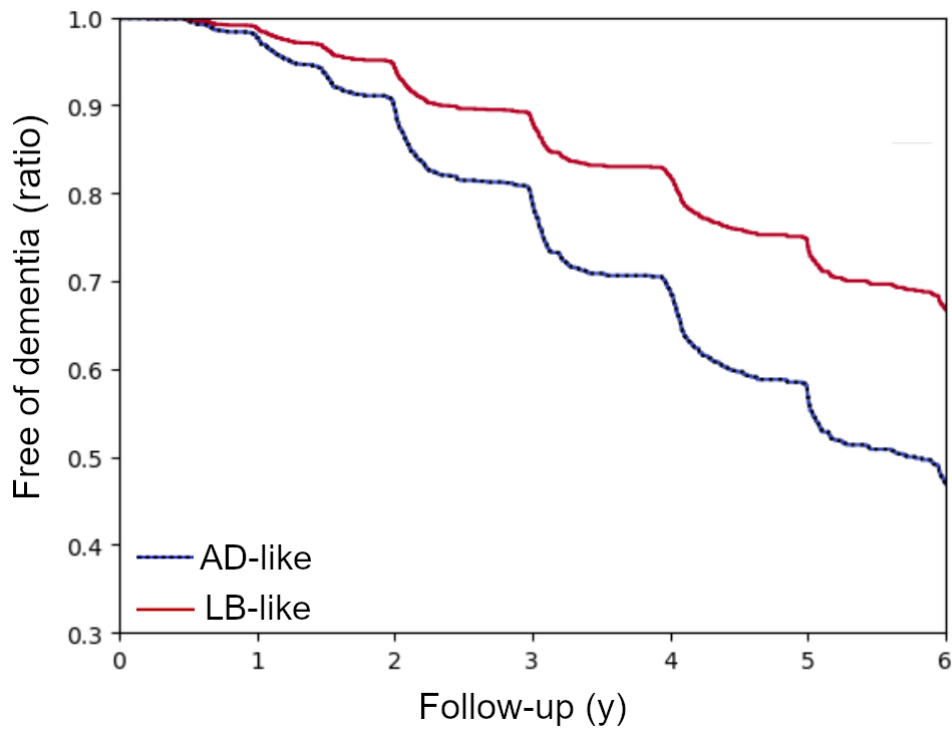

+

## Supplementary Tables

**Supplementary Table S1:** Regions of Interest (ROIs) from the Harvard-Oxford atlas included in each of the composite regions used to calculate CISr, Occipital SUVR and MTL SUVR. Bilateral ROIs were combined in all cases.

| <b>Composite Region</b>     | <b>Atlas ROIs</b>                                                                                              |
|-----------------------------|----------------------------------------------------------------------------------------------------------------|
| <i>Cingulate Cortex</i>     | Cingulate Gyrus posterior division                                                                             |
| <i>Precuneus + Cuneus</i>   | Precuneus Cortex, Cuneal Cortex                                                                                |
| <i>Occipital Cortex</i>     | Intracalcarine Cortex<br>Cuneal Cortex<br>Lingual Gyrus<br>Supracalcarine Cortex<br>Occipital Pole             |
| <i>Medial Temporal Lobe</i> | Parahippocampal Gyrus anterior division<br>Parahippocampal Gyrus posterior division<br>Hippocampus<br>Amygdala |

**Supplementary Table S2:** Regions of Interests (ROIs) from the Harvard-Oxford atlas used for filtering regional hypometabolism relevant for AD or DLB. Patients presenting hypometabolism in any of the ROIs passed the applied filtering. Bilateral ROIs were combined in all cases.

| <b>Disease</b> | <b>ROIs</b>                                                                                                                                                                                                                                                                                                                                                                                                                                                                                                         |
|----------------|---------------------------------------------------------------------------------------------------------------------------------------------------------------------------------------------------------------------------------------------------------------------------------------------------------------------------------------------------------------------------------------------------------------------------------------------------------------------------------------------------------------------|
| <i>AD</i>      | Precuneus Cortex<br>Cingulate Gyrus posterior division<br>Parahippocampal Gyrus anterior division<br>Parahippocampal Gyrus posterior division<br>Hippocampus<br>Amygdala<br>Inferior Temporal Gyrus anterior division<br>Inferior Temporal Gyrus posterior division<br>Inferior Temporal Gyrus temporooccipital part<br>Middle Temporal Gyrus posterior division<br>Middle Temporal Gyrus temporooccipital part<br>Supramarginal Gyrus anterior division<br>Supramarginal Gyrus posterior division<br>Angular Gyrus |
| <i>DLB</i>     | Intracalcarine Cortex<br>Supracalcarine Cortex<br>Lingual Gyrus<br>Occipital Pole<br>Cuneal Cortex                                                                                                                                                                                                                                                                                                                                                                                                                  |

**Supplementary Table S3:** Regions of Interest (ROIs) from the Desikan atlas used for creating the global cortical composite ROI for global SUVR measurement in A $\beta$ -PET.

| <b>Global SUVR</b>                          | <b>Desikan ROIs</b>                                                                                                                                                                                        |
|---------------------------------------------|------------------------------------------------------------------------------------------------------------------------------------------------------------------------------------------------------------|
| <i>Frontal regions</i>                      | Caudal middle frontal<br>Lateral orbitofrontal<br>Medial orbitofrontal<br>Pars opercularis<br>Pars orbitalis<br>Pars triangularis<br>Rostral middle frontal<br>Superior frontal<br>Frontal pole            |
| <i>Anterior/posterior cingulate regions</i> | Caudal anterior cingulate<br>Isthmus cingulate<br>Posterior cingulate<br>Rostral anterior cingulate<br>Caudal anterior cingulate<br>Isthmus cingulate<br>Posterior cingulate<br>Rostral anterior cingulate |
| <i>Lateral parietal regions</i>             | Inferior parietal<br>Precuneus<br>Superior parietal<br>Supramarginal                                                                                                                                       |
| <i>Lateral temporal regions</i>             | Inferior temporal<br>Middle temporal<br>Superior temporal                                                                                                                                                  |

**Supplementary Table S4:** Regions of Interest (ROIs) from the Desikan atlas used for creating the composite Braak ROIs.

| <b>Braak Area Composite</b> | <b>Desikan ROIs</b>                                                                                                                                                                                                                                                                                                                                                                                                                                                                                                  |
|-----------------------------|----------------------------------------------------------------------------------------------------------------------------------------------------------------------------------------------------------------------------------------------------------------------------------------------------------------------------------------------------------------------------------------------------------------------------------------------------------------------------------------------------------------------|
| <i>Braak I/II</i>           | Entorhinal                                                                                                                                                                                                                                                                                                                                                                                                                                                                                                           |
| <i>Braak III/IV</i>         | Parahippocampal<br>Fusiform<br>Amygdala<br>Middle Temporal<br>Inferior Temporal                                                                                                                                                                                                                                                                                                                                                                                                                                      |
| <i>Braak V/VI</i>           | Lingual<br>Caudal Anterior Cingulate<br>Rostral Anterior Cingulate<br>Posterior Cingulate<br>Isthmus of Cingulate Gyrus<br>Insula<br>Temporal Pole<br>Frontal Association Cortex SUPFR<br>Frontal Association Cortex FPORB<br>Frontal Association Cortex MIDFR<br>Frontal Association Cortex PARSFR<br>Lateral Occipital<br>Parietal Supramarginal<br>Parietal Inferior<br>Superior Temporal<br>Parietal Superior<br>Precuneus<br>Transv Temp<br>Pericalcarine<br>Postcentral<br>Cuneus<br>Precentral<br>Paracentral |

**Supplementary Table S5:** Demographical and clinical data for subjects excluded by the  $z \leq -1.5$  hypometabolism filter and comparison with included subjects.

|                                   | aMCI             |                               | ADD             |                              |
|-----------------------------------|------------------|-------------------------------|-----------------|------------------------------|
|                                   | Excluded (n=385) | vs. Included                  | Excluded (n=20) | vs. Included                 |
| <b>Age, y</b>                     | 70.8 ± 7.7       | <b>p&lt;0.001</b> (*)         | 72.2 ± 7.7      | d=-0.37 p=0.11               |
| <b>Male/Female (%)</b>            | 54/46            | p= 0.13                       | 50/50           | p= 0.48                      |
| <b>Education, y</b>               | 16.1 ± 2.7       | d=0 p=0.88                    | 14.8 ± 3.7      | d=0.23 p=0.31                |
| <b>APOE ε4, --/+-<br/>/++ (%)</b> | 54/36/10         | <b>p= 0.01</b> (*)            | 25/50/25        | p=0.62                       |
| <b>MMSE</b>                       | 28.2 ± 1.6       | <b>d=0.42 p&lt;0.001</b> (*)  | 28.0 ± 1.8      | <b>d=2.35 p&lt;0.001</b> (*) |
| <b>ADNI-MEM</b>                   | 0.5 ± 0.6        | <b>d=0.55 p&lt;0.001</b> (*)  | 0.4 ± 0.6       | <b>d=2.33 p&lt;0.001</b> (*) |
| <b>ADNI-EF</b>                    | 0.5 ± 0.8        | <b>d=-0.48 p&lt;0.001</b> (*) | 0.53 ± 0.81     | <b>d=1.61 p&lt;0.001</b> (*) |
| <b>Δ(MEM-EF)</b>                  | 0.0 ± 1.1        | d=0.07 p=0.32                 | -0.03 ± 1.08    | d=0.14, p=0.16               |
